# Supplementary material for: Functionalized Ionic Liquids-Modified Metal–Organic Framework Material Boosted the Enzymatic Performance of Lipase
Source: MDPI journal article supplement (doi:10.3390/molecules29102381), 2024-05-18
Supplement: s1 [file s1]

## Supporting information

### Optimal immobilization conditions

In the process of optimizing the immobilization conditions, the lipase activity was carried out at 40 °C and pH=7. The maximum lipase activity was defined as 100%.

#### 1. Lipase concentration

The carriers (UiO-66-NH<sub>2</sub>-DAS or UiO-66-NH<sub>2</sub>-NIL-DAS) were disperseded in the mixture (10 mL) containing phosphate buffer solution (0.1 M, pH=7) and different volumes of lipase solution (4-8 mL). Then the system was incubated at 30 °C for 4 h. The immobilized lipase was washed several times. Finally, the activity and loading capacity were examined.

#### 2. pH

The UiO-66-NH<sub>2</sub>-DAS was sonicated in the mixture (10 mL) containing 5 mL phosphate buffer solution (0.1 M, pH=6-8) and 5 mL lipase concentration. The system was incubated at 30 °C for 4 h. The UiO-66-NH<sub>2</sub>-NIL-DAS was sonicated in the mixture (10 mL) containing 4 mL phosphate buffer solution (0.1 M, pH=6-8) and 6 mL lipase concentration. Then the system was incubated at 30 °C for 4 h. The immobilized lipase was washed several times. Finally the activity and loading capacity were examined.

#### 3. Temperature

The supports (UiO-66-NH<sub>2</sub>-DAS and UiO-66-NH<sub>2</sub>-NIL-DAS) were sonicated in the mixture (10 mL) containing phosphate buffer solution (0.1 M, pH=7) and their respective lipase solution. Finally, the suspension was incubated at 30-50 °C for 4 h. The immobilized lipase was washed several times. Finally, the activity and loading capacity were examined.

#### 4. Time

The supports (UiO-66-NH<sub>2</sub>-DAS and UiO-66-NH<sub>2</sub>-NIL-DAS) were sonicated in the mixture (10 mL) containing phosphate buffer solution (0.1 M, pH=7) and their respective lipase solution. Finally, the suspension was incubated at 40 °C for 4-8 h. The immobilized lipase was washed several times. Finally, the activity and loading capacity were examined.

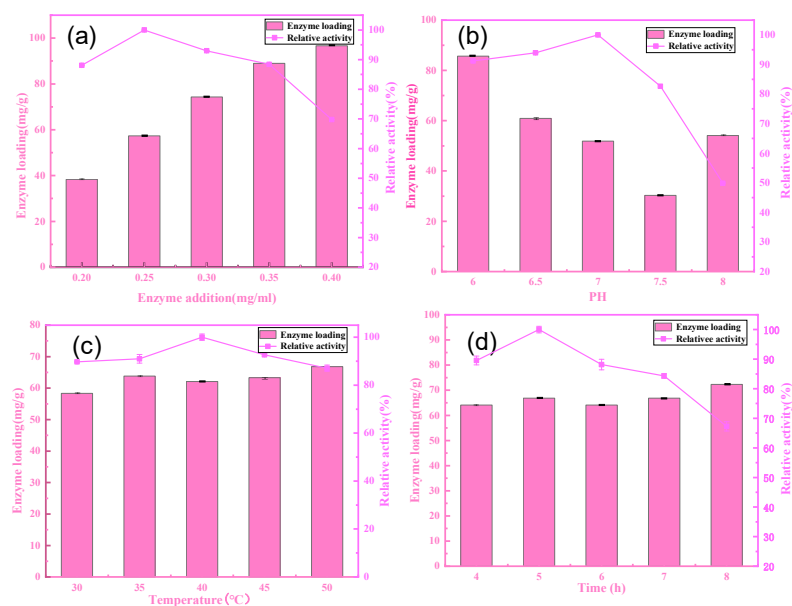

**Figure S1.** Effects of initially added lipase concentration (a), pH (b), temperature (c), and immobilization time (d) on lipase loading and relative activity of UiO-66-NH<sub>2</sub>-DAS carrier.

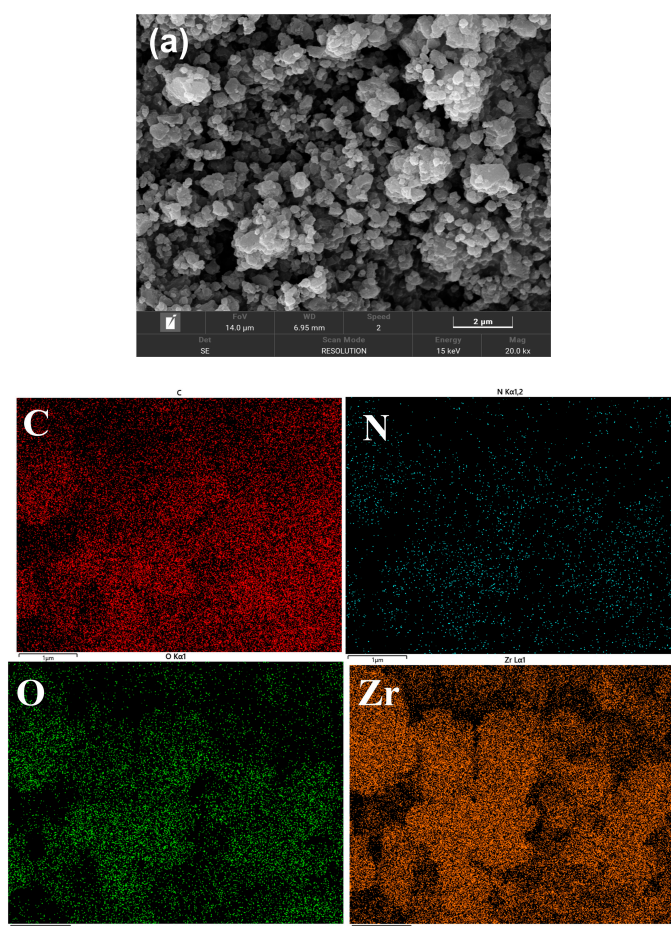

**Figure.S2** SEM images of UiO-66-NH<sub>2</sub>-DAS(a).

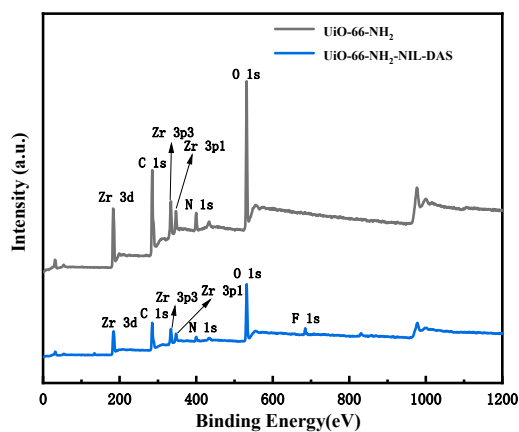

**Figure.S3** XPS survey scans of UiO-66-NH<sub>2</sub> and UiO-66-NH<sub>2</sub>-NIL-DAS.

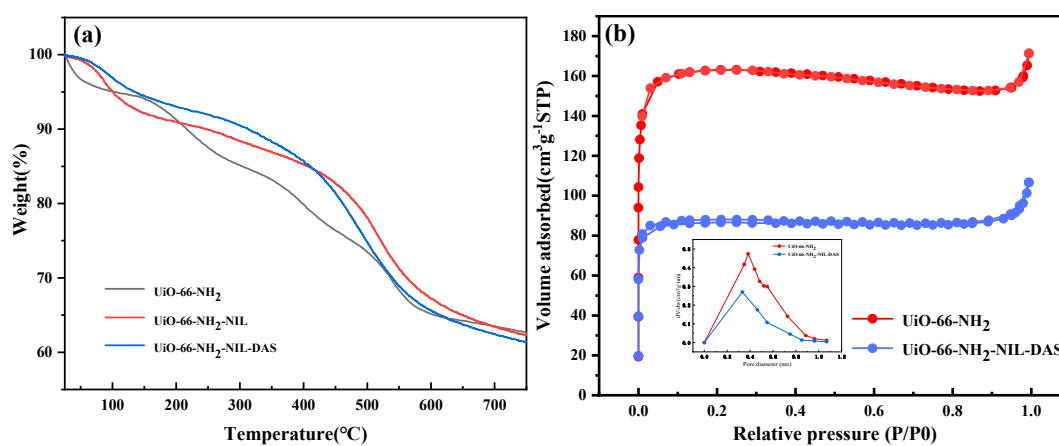

**Figure S4.** TGA (a) and N<sub>2</sub> adsorption-desorption curve (b) of the three prepared carriers.

**Table S1. Optimal immobilization conditions for carriers**

| Supports                        | Lipase concentration(mg/mL) | pH  | Temperature<br>(°C) | Immobilized time(h) |
|---------------------------------|-----------------------------|-----|---------------------|---------------------|
| UiO-66-NH <sub>2</sub> -DAS     | 0.25                        | 7.0 | 40                  | 5.0                 |
| UiO-66-NH <sub>2</sub> -NIL-DAS | 0.30                        | 7.0 | 40                  | 5.0                 |
